# Supplementary material for: Oxidative etching of S-vacancy defective MoS2 monolayer upon reaction with O2
Source: Royal Society of Chemistry journal article supplement (doi:10.1039/d0cp06502a), 2021-01-01
Supplement: d0cp06502a1.pdf [file d0cp06502a1.pdf]

Supplementary Information

**Oxidative Etching of S-Vacancy Defective MoS<sub>2</sub> Monolayer Upon  
Reaction with O<sub>2</sub>**

Lucas M. Farigliano<sup>a</sup>, Patricia A. Paredes-Olivera<sup>b</sup>, Eduardo M. Patrito<sup>a\*</sup>

<sup>a</sup>Departamento de Fisicoquímica and <sup>b</sup>Departamento de Química Teórica y Computacional.  
Instituto de Investigaciones en Físico Química de Córdoba (INFIQC). Facultad de Ciencias  
Químicas, Universidad Nacional de Córdoba, X5000HUA Córdoba, Argentina.

\*Email: [mpatrito@gmail.com](mailto:mpatrito@gmail.com)

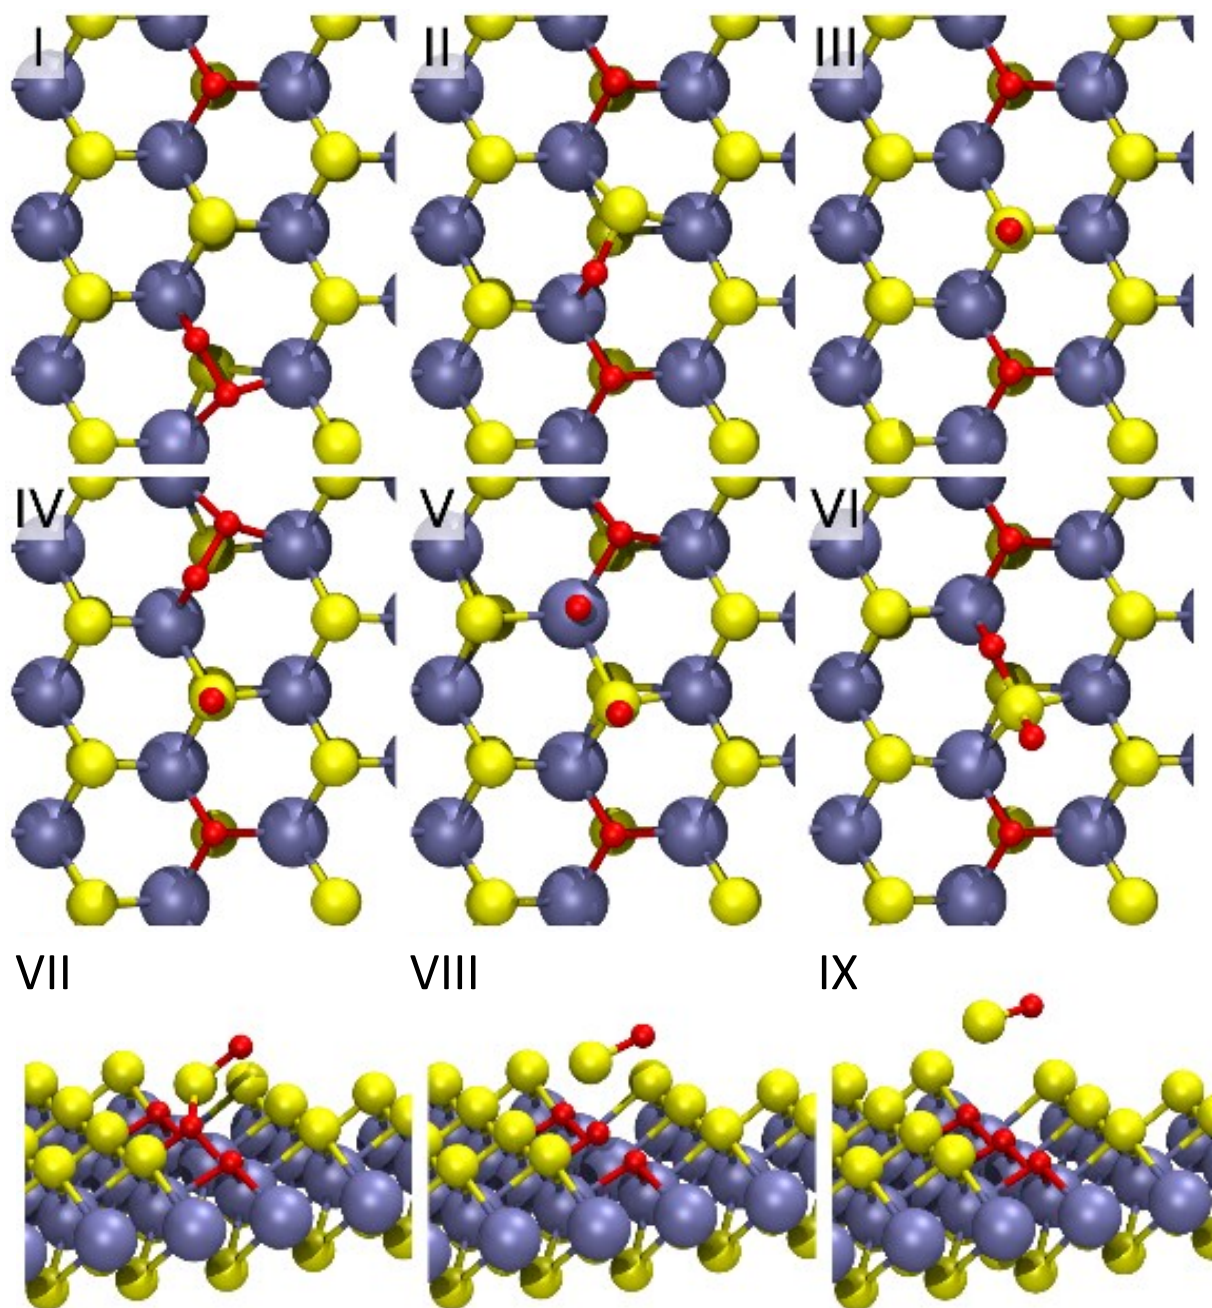

**Figure S1.** Intermediates obtained from CI-NEB calculations corresponding to the energy pathway in Figure 7 in the manuscript. **I)** Initial structure having upright and lying-down  $O_2$  molecules adsorbed on S vacancy sites separated by a sulfur atom. **II)** Breakage of O–O bond of lying-down  $O_2$  molecule, the formation of Mo–O–S–Mo intermediate and adsorption of O atom on hollow site between three Mo atoms. **III)** Breakage of Mo–O bond and formation of SO group. **IV)** Upper  $O_2$  molecule switches from upright to lying-down configuration. **V)** Breakage of O–O bond yielding an O atom in the hollow site and an O atom ontop of Mo. **VI)** Formation of new O–S bond yielding  $SO_2$  moiety bonded to the surface via S–O and Mo–S bonds. **VII)** Reorientation of  $SO_2$  moiety after breakage of Mo–S bonds. **VIII)** Intermediate with enlarged O–S bond. **IX)** Desorption of SO molecule leaving three O atoms located on Mo hollow sites.

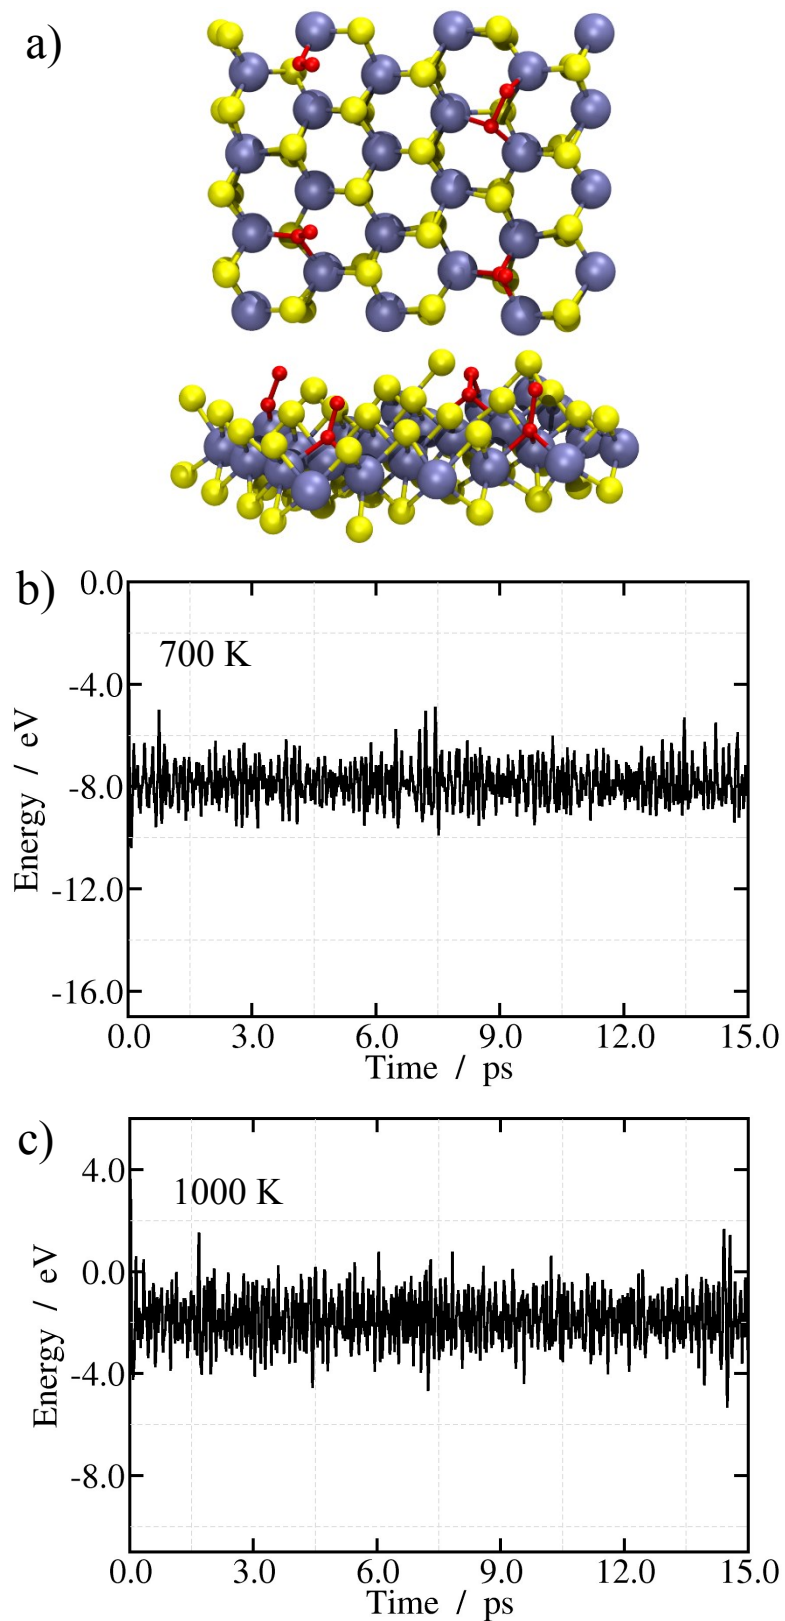

**Figure S2.** a) Supercell employed in AIMD simulations having two pairs of O<sub>2</sub> molecules adsorbed on S-vacancy sites. Each pair is separated by an S atom. Total energy profiles during AIMD simulations at b) 700 K and c) 1000 K. O<sub>2</sub> molecules remained adsorbed on the vacancy sites without further reactions.

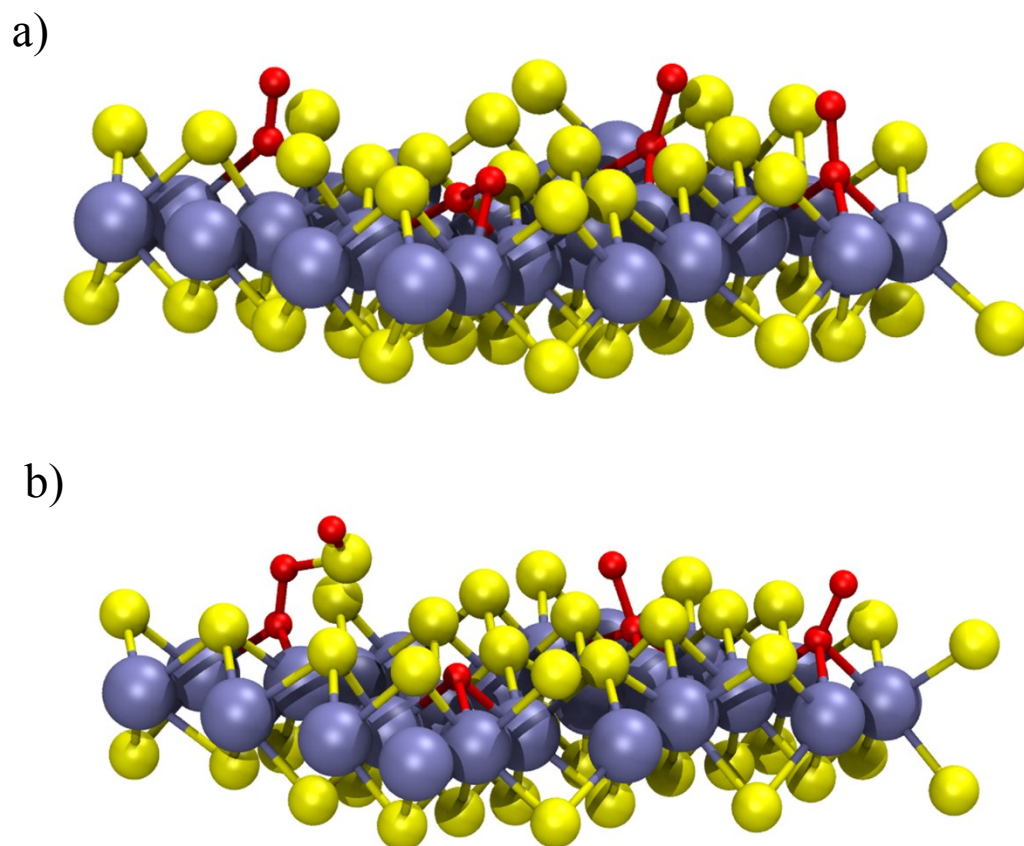

**Figure S3.** **a)** Snapshot of initial supercell structure at 0.147 ps having two pairs of  $\text{O}_2$  molecules adsorbed on S-vacancy sites. Three of them are in the upright configuration and one of them in the lying-down configuration. **b)** Snapshot at 2.747 ps (before the desorption of  $\text{SO}_2$ ) showing the abstraction of an O atom of  $\text{O}_2$  by an SO group formed before. AIMD simulations performed at 1500 K.
